# Supplementary material
Source: ML conference proceedings conference paper supplement (https://proceedings.neurips.cc/paper_files/paper/2017/hash/fb2606a5068901da92473666256e6e5b-Abstract.html)
Supplement: Supplementary file [file fb2606a5068901da92473666256e6e5b-Supplemental.zip]

## Supplementary Material

Our analysis uses the following standard inequalities. For any  $x^1, x^2, \dots, x^M \in \mathbb{R}^N$  and  $\varepsilon > 0$ , it holds that

$$\langle x^1, x^2 \rangle \leq \varepsilon \|x^1\|_2^2 + \frac{1}{\varepsilon} \|x^2\|_2^2 \quad (31)$$

$$\langle x^1, x^2 \rangle \leq \|x^1\|_2 \cdot \|x^2\|_2 \quad (32)$$

$$\left\| \sum_{i=1}^M x^i \right\|_2^2 \leq M \left( \sum_{i=1}^M \|x^i\|_2^2 \right) \quad (33)$$

$$\|d^k\|_2 = \|x^k - \hat{x}^k\|_2 \leq \sum_{i=k-j(k)}^{k-1} \|\Delta^i\|_2 \quad (34)$$

The last inequality is derived from (4), where  $d^k$  is defined, using a telescoping sum and the triangle inequality.

### Proof of Lemma 1

Note that  $\Delta_i^k = \delta(i, i_k) \cdot \Delta_{i_k}^k$ , where  $\delta(i, j)$  denotes the Kronecker delta:  $\delta(i, j) = \begin{cases} 0, & i \neq j \\ 1, & \text{else} \end{cases}$ .

Recalling the algorithm (2), we have:

$$-\langle \Delta^k, \nabla f(\hat{x}^k) \rangle = -\langle \Delta_{i_k}^k, \nabla_{i_k} f(\hat{x}^k) \rangle = \frac{L}{\gamma} \|\Delta^k\|_2^2. \quad (35)$$

Since  $\nabla f$  is  $L$ -Lipschitz,

$$f(x^{k+1}) \leq f(x^k) + \langle \nabla f(x^k), \Delta^k \rangle + \frac{L}{2} \|\Delta^k\|_2^2. \quad (36)$$

Hence

$$\begin{aligned} f(x^{k+1}) - f(x^k) &\stackrel{(35)(36)}{\leq} \langle \nabla f(x^k) - \nabla f(\hat{x}^k), \Delta^k \rangle + \left(\frac{L}{2} - \frac{L}{\gamma}\right) \|\Delta^k\|_2^2 \\ &\stackrel{a)}{\leq} L \|d^k\|_2 \cdot \|\Delta^k\|_2 + \left(\frac{L}{2} - \frac{L}{\gamma}\right) \|\Delta^k\|_2^2 \\ &\stackrel{(34), j(k) \leq \tau}{\leq} L \sum_{d=k-\tau}^{k-1} \|\Delta^d\|_2 \cdot \|\Delta^k\|_2 + \left(\frac{L}{2} - \frac{L}{\gamma}\right) \|\Delta^k\|_2^2 \\ &\stackrel{b)}{\leq} \frac{L}{2\varepsilon} \sum_{i=k-\tau}^{k-1} \|\Delta^i\|_2^2 + \left[ \frac{(\tau\varepsilon+1)L}{2} - \frac{L}{\gamma} \right] \|\Delta^k\|_2^2, \end{aligned} \quad (37)$$

where a) follows from (32) and the Lipschitzness of  $\nabla f$ , and b) is obtained by applying  $a \cdot b \leq \frac{1}{2\varepsilon}|a|^2 + \frac{1}{2\varepsilon}|b|^2$  (where  $\varepsilon > 0$  is arbitrary) to each term in the sum.

If  $\gamma < \frac{2}{2\tau+1}$ , we can choose  $\varepsilon > 0$  such that  $\varepsilon + \frac{1}{\varepsilon} = 1 + \frac{1}{\tau}(\frac{1}{\gamma} - \frac{1}{2})$ . Then, it can be verified by direct calculation and substitutions that we have:

$$\begin{aligned} \xi_k - \xi_{k+1} &\stackrel{(10)}{=} f(x^k) - f(x^{k+1}) + \frac{L}{2\varepsilon} \sum_{i=k-\tau}^{k-1} (i - (k - \tau) + 1) \|\Delta^i\|_2^2 \\ &\quad - \frac{L}{2\varepsilon} \sum_{i=k+1-\tau}^{k-1} (i - (k - \tau)) \|\Delta^i\|_2^2 - \frac{L}{2\varepsilon} \tau \|\Delta^k\|_2^2 \\ &\stackrel{c)}{=} f(x^k) - f(x^{k+1}) + \frac{L}{2\varepsilon} \sum_{i=k-\tau}^{k-1} \|\Delta^i\|_2^2 - \frac{L}{2\varepsilon} \tau \|\Delta^k\|_2^2 \stackrel{(37)}{\geq} \frac{1}{2} \left( \frac{1}{\gamma} - \frac{1}{2} - \tau \right) L \cdot \|\Delta^k\|_2^2, \end{aligned} \quad (38)$$

where c) follows from  $(i - (k - \tau) + 1) \|\Delta^i\|_2^2 - (i - (k - \tau)) \|\Delta^i\|_2^2 = \|\Delta^i\|_2^2$ . Therefore we have  $\|\Delta^k\|_2^2 \in \ell^1$  by using a telescoping sum<sup>8</sup>. This immediately implies (12), and (13) follows from [Lemma 3, [5]].

<sup>8</sup>We write  $a^k \in \ell^1$  if  $\sum_{k=1}^{\infty} |a^k| < \infty$ .

### Proof of Theorem 1

Let  $t = t(k) = \lfloor k/N' \rfloor$ . Recall  $K(i, t)$  is defined at Sec. 1.1. Notice we have:

$$\begin{aligned} \|\nabla_i f(x^k)\|_2 &\stackrel{a)}{\leq} \|\nabla_i f(\hat{x}^{K(i,t)})\|_2 + \|\nabla_i f(x^k) - \nabla_i f(\hat{x}^k)\|_2 + \|\nabla_i f(\hat{x}^k) - \nabla_i f(\hat{x}^{K(i,t)})\|_2 \\ &\stackrel{b)}{\leq} \|\nabla_i f(\hat{x}^{K(i,t)})\|_2 + L\|d^k\|_2 + L \sum_{j=K(i,t)}^{k-1} \|\hat{x}^{j+1} - \hat{x}^j\|_2, \end{aligned} \quad (39)$$

where a) is by the triangle inequality and b) by Lipschitzness of  $\nabla f$  and then applying the triangle inequality to the expansion of  $\|\hat{x}^k - \hat{x}^{K(i,t)}\|$ . We now bound each of the right-hand terms.

From Lemma 1 and by (34), we have

$$\lim_k \|d^k\|_2 \leq \lim_k \sum_{i=k-\tau}^{k-1} \|\Delta^i\|_2 = 0, \quad (40)$$

since  $\Delta^k \rightarrow 0$ . By the triangle inequality, we can derive

$$\|\hat{x}^{k+1} - \hat{x}^k\|_2 \leq \|d^k\|_2 + \|d^{k+1}\|_2 + \|\Delta^k\|_2. \quad (41)$$

Taking the limit,

$$\lim_k \|\hat{x}^{k+1} - \hat{x}^k\|_2 = 0. \quad (42)$$

Now notice:

$$\|\nabla_i f(\hat{x}^{K(i,t)})\|_2 = \|\nabla_{i_{K(i,t)}} f(\hat{x}^{K(i,t)})\|_2 = \frac{L}{\gamma} \|\Delta^{K(i,t)}\|_2. \quad (43)$$

Since, as  $k \rightarrow \infty$ ,  $K(i, t) \rightarrow \infty$  and  $\|\Delta^k\|_2 \rightarrow 0$ , this last term converges to 0 and the limit result is proven. The running best rate is obtained through the following argument: since  $\|\Delta^k\|_2$  is square summable (by Lemma 1), so are  $\|d^k\|_2$  by (34),  $\|\hat{x}^{k+1} - \hat{x}^k\|_2$  by (41), and  $\|\nabla_i f(\hat{x}^{K(i,t)})\|_2$  (since  $t = \Theta(k)$ ) by (43). Hence,  $\|\nabla_i f(x^k)\|_2$  is square summable. This implies  $\|\nabla f(x^k)\|_2$  is square summable, hence  $\lim_k \|\nabla f(x^k)\|_2 = 0$ , and we obtain the running best rate again from [Lemma 3, [5]].

### Proof of Theorem 2

Taking the expectation on both sides of (15) and multiplying  $N$  yields

$$N\mathbb{E}\|\nabla_{i_k} f(x^{k-\tau})\|_2 = \sum_{i=1}^N \mathbb{E}\|\nabla_i f(x^{k-\tau})\|_2. \quad (44)$$

By  $\|\cdot\|_2 \leq \|\cdot\|_1$ , we obtain:

$$\mathbb{E}\|\nabla f(x^{k-\tau})\|_2 \leq \sum_{i=1}^N \mathbb{E}\|\nabla_i f(x^{k-\tau})\|_2 \stackrel{(44)}{=} N\mathbb{E}\|\nabla_{i_k} f(x^{k-\tau})\|_2. \quad (45)$$

In the next part, we prove  $\mathbb{E}\|\nabla_{i_k} f(x^{k-\tau})\|_2 \rightarrow 0$ . From (11), we can see that  $(\|\Delta^k\|_2)_{k \geq 0}$  is bounded. The dominated convergence theorem implies:

$$\lim_k \mathbb{E}\|\Delta^k\|_2 = 0. \quad (46)$$

By (34), we have:

$$\lim_k \mathbb{E}(\|d^k\|_2) = 0. \quad (47)$$

Hence,

$$\lim_k \mathbb{E}\|\nabla_{i_k} f(\hat{x}^k)\|_2 \stackrel{(2)}{=} \frac{L}{\gamma} \lim_k \mathbb{E}\|\Delta^k\|_2 = 0. \quad (48)$$

The triangle inequality and  $L$ -Lipschitz continuity yield

$$\begin{aligned} \mathbb{E}\|\nabla_{i_k} f(x^{k-\tau})\|_2 &\leq \mathbb{E}\|\nabla_{i_k} f(\hat{x}^k)\|_2 + \mathbb{E}\|\nabla_{i_k} f(x^k) - \nabla_{i_k} f(\hat{x}^k)\|_2 \\ &\quad + \mathbb{E}\|\nabla_{i_k} f(x^k) - \nabla_{i_k} f(x^{k-\tau})\|_2 \\ &\leq \mathbb{E}\|\nabla_{i_k} f(\hat{x}^k)\|_2 + L \cdot \mathbb{E}\|d^k\|_2 + L \sum_{i=k-\tau}^{k-1} \mathbb{E}\|\Delta^i\|_2. \end{aligned} \quad (49)$$

Applying (46), (47), and (48) to (49) yields

$$\lim_k \mathbb{E}\|\nabla_{i_k} f(x^{k-\tau})\|_2 = 0. \quad (50)$$

Using (45), (50) yields

$$\lim_k \mathbb{E}\|\nabla f(x^{k-\tau})\|_2 = 0, \quad (51)$$

which is equivalent to

$$\lim_k \mathbb{E}\|\nabla f(x^k)\|_2 = 0. \quad (52)$$

Following a proof similar to that of Theorem 1 (except with added expectations),  $\mathbb{E}\|\nabla f(x^k)\|_2^2$  is summable and thus has the running best rate  $\mathcal{O}(1/k)$ .

## Proof of Lemma 2

The proof consists of two steps: in the first one, we prove

$$\pi_k - \pi_{k+1} \geq \frac{L}{4\tau} \left( \frac{1}{\gamma} - \frac{1}{2} - \tau \right) \cdot (\mathbb{E}S(k+1, \tau+1)), \quad (53)$$

while in the second one, we prove

$$\pi_k^2 \leq \beta \cdot (\mathbb{E}S(k+1, \tau+1)) \cdot (\delta\tau\mathbb{E}S(k, \tau) + \mathbb{E}\|x^k - \overline{x^k}\|_2^2). \quad (54)$$

Combining (53) and (54) gives us the claim in the lemma.

**Proving (53):** Since  $\gamma < \frac{2}{2\tau+1}$ , we can choose  $\varepsilon > 0$  such that

$$\varepsilon + \frac{1}{\varepsilon} = 1 + \frac{1}{\tau} \left( \frac{1}{\gamma} - \frac{1}{2} \right) \quad (55)$$

Direct subtraction of  $F_k$  and  $F_{k+1}$  yields:

$$\begin{aligned} F_k - F_{k+1} &\stackrel{a)}{\geq} f(x^k) - f(x^{k+1}) + \delta \sum_{i=k-\tau}^{k-1} (i - (k - \tau) + 1) \|\Delta^i\|_2^2 \\ &\quad - \delta \sum_{i=k+1-\tau}^{k-1} (i - (k - \tau)) \|\Delta^i\|_2^2 - \delta\tau \|\Delta^k\|_2^2 \\ &\stackrel{b)}{=} f(x^k) - f(x^{k+1}) + \delta S(k, \tau) - \delta\tau \|\Delta^k\|_2^2 \\ &\stackrel{c)}{\geq} \left( \delta - \frac{L}{2\varepsilon} \right) S(k, \tau) + \left[ \frac{L}{\gamma} - \frac{(\tau\varepsilon+1)L}{2} - \delta\tau \right] \|\Delta^k\|_2^2 \\ &\stackrel{d)}{=} \frac{L}{4\tau} \left( \frac{1}{\gamma} - \frac{1}{2} - \tau \right) \cdot S(k, \tau) + \frac{L}{4} \left( \frac{1}{\gamma} - \frac{1}{2} - \tau \right) \cdot \|\Delta^k\|_2^2 \\ &\stackrel{e)}{\geq} \frac{L}{4\tau} \left( \frac{1}{\gamma} - \frac{1}{2} - \tau \right) \cdot S(k, \tau) + \frac{L}{4\tau} \left( \frac{1}{\gamma} - \frac{1}{2} - \tau \right) \cdot \|\Delta^k\|_2^2 \\ &\stackrel{f)}{=} \frac{L}{4\tau} \left( \frac{1}{\gamma} - \frac{1}{2} - \tau \right) \cdot S(k+1, \tau+1), \end{aligned} \quad (56)$$

where a) follows from the definition  $F_k$ , b) from the definition of  $S(k, \tau)$ , c) from (37), d) is a direct computation using (55), e) is due to  $\tau \geq 1$ , and f) is also a result of the definition of  $S(k, \tau)$ .

**Proving (54):** The convexity of  $f$  yields

$$f(x^k) - f(\bar{x}^k) \leq \langle \nabla f(x^k), \bar{x}^k - x^k \rangle. \quad (57)$$

Let

$$a^k := \begin{pmatrix} \bar{x}^k - x^k \\ \sqrt{\delta\tau}\Delta^{k-1} \\ \vdots \\ \sqrt{\delta\tau}\Delta^{k-\tau} \end{pmatrix}, \quad b^k := \begin{pmatrix} \nabla f(x^k) \\ \sqrt{\delta\tau}\Delta^{k-1} \\ \vdots \\ \sqrt{\delta\tau}\Delta^{k-\tau} \end{pmatrix}. \quad (58)$$

Using this and the definition of  $F_k$  (18), we have:

$$F_k - \min f \leq \langle a^k, b^k \rangle \leq \|a^k\|_2 \|b^k\|_2. \quad (59)$$

We bound  $\mathbb{E}\|\nabla_{i_k} f(x^{k-\tau})\|_2^2$  as follows:

$$\begin{aligned} \mathbb{E}\|\nabla_{i_k} f(x^{k-\tau})\|_2^2 &\stackrel{a)}{\leq} \mathbb{E}(\|\nabla_{i_k} f(x^k)\|_2 + \|\nabla_{i_k} f(x^{k-\tau}) - \nabla_{i_k} f(x^k)\|_2)^2 \\ &\stackrel{b)}{\leq} 2\mathbb{E}\|\nabla_{i_k} f(x^k)\|_2^2 + 2L^2\tau \sum_{i=k-\tau}^{k-1} \mathbb{E}\|\Delta^i\|_2^2 \\ &\stackrel{c)}{\leq} 4\mathbb{E}\|\nabla_{i_k} f(\hat{x}^k)\|_2^2 + 4L^2\mathbb{E}\|d^k\|_2^2 + 2L^2\tau \sum_{i=k-\tau}^{k-1} \mathbb{E}\|\Delta^i\|_2^2 \\ &= \frac{4L^2}{\gamma^2}\mathbb{E}\|\Delta^k\|_2^2 + 6L^2\tau \sum_{i=k-\tau}^{k-1} \mathbb{E}\|\Delta^i\|_2^2, \end{aligned} \quad (60)$$

where a) follows from the triangle inequality, b) from the Lipschitznes of  $\nabla f$  and (33), and c) from  $\|\nabla_{i_k} f(x^k)\|_2^2 \leq 2\|\nabla_{i_k} f(\hat{x}^k)\|_2^2 + 2\|d^k\|_2^2$  and (34). We also have the bound

$$\|\nabla f(x^k)\|_2^2 \leq 2\|\nabla f(x^{k-\tau})\|_2^2 + 2L^2\tau \sum_{i=k-\tau}^{k-1} \|\Delta^i\|_2^2, \quad (61)$$

Hence, applying (44) to (60) yields

$$\mathbb{E}\|\nabla f(x^{k-\tau})\|_2^2 \leq \frac{4NL^2}{\gamma^2}\mathbb{E}\|\Delta^k\|_2^2 + 6NL^2\tau \sum_{i=k-\tau}^{k-1} \mathbb{E}\|\Delta^i\|_2^2,$$

and further with (61),

$$\mathbb{E}\|\nabla f(x^k)\|_2^2 \leq \frac{8NL^2}{\gamma^2}\mathbb{E}\|\Delta^k\|_2^2 + (12N + 2)L^2\tau \sum_{i=k-\tau}^{k-1} \mathbb{E}\|\Delta^i\|_2^2. \quad (62)$$

Finally we obtain (54) from

$$\begin{aligned} \pi_k^2 &= [\mathbb{E}(F_k - \min f)]^2 \stackrel{(59)}{\leq} \mathbb{E}(\|a^k\|_2 \|b^k\|_2)^2 \leq \mathbb{E}(\|a^k\|_2^2) \cdot \mathbb{E}(\|b^k\|_2^2) \\ &\stackrel{a)}{\leq} (\delta\tau\mathbb{E}S(k, \tau) + \mathbb{E}\|\nabla f(x^k)\|_2^2) \times (\delta\tau\mathbb{E}S(k, \tau) + \mathbb{E}\|x^k - \bar{x}^k\|_2^2) \\ &\stackrel{b)}{\leq} \beta\mathbb{E}S(k+1, \tau+1) \cdot (\delta\tau\mathbb{E}S(k, \tau) + \mathbb{E}\|x^k - \bar{x}^k\|_2^2), \end{aligned} \quad (63)$$

where a) follows from the definitions of  $a^k, b^k$  and b) from (62) and the definition of  $S(k, \tau)$ .

### Proof of Theorem 3

With (56), we can see that  $f(x^k) \leq F_k \leq F_0$ . Since  $f$  is coercive, the sequence  $(x^k)_{k \geq 0}$  is bounded. Hence, we have  $\sup_k \{\|x^k - \bar{x}^k\|_2\} < +\infty$ . Hence, there exists  $R > 0$  such that

$$\alpha \left( \sum_{i=k-\tau}^{k-1} \tau \delta \mathbb{E}\|\Delta^i\|_2^2 + \mathbb{E}\|x^k - \bar{x}^k\|_2^2 \right) \leq \frac{1}{R}. \quad (64)$$

for all  $k$ . Using Lemma 2, we have

$$\pi_k - \pi_{k+1} \geq R\pi_k^2. \quad (65)$$

Using (56), we can see that  $\pi_k \geq \pi_{k+1}$  for all  $k$ . Thus, we have

$$\pi_k - \pi_{k+1} \geq R\pi_{k+1}\pi_k \quad (66)$$

$$\implies \frac{1}{\pi_{k+1}} - \frac{1}{\pi_k} \geq R. \quad (67)$$

Therefore, using a telescoping sum, we can deduce that:

$$\pi_{k+1} \leq \frac{1}{kR + \frac{1}{\pi_0}}. \quad (68)$$

Noting  $\mathbb{E}(f(x^k) - \min f) \leq \pi_k$ , we have proven the result.

#### Proof of Theorem 4

We have

$$\mathbb{E}(f(x^k) - \min f) \geq \nu \mathbb{E}\|x^k - \bar{x}^k\|_2^2, \quad (69)$$

Hence recalling the definition from (18), we have

$$\mathbb{E}\pi_k \geq \nu \mathbb{E}\|x^k - \bar{x}^k\|_2^2 + \sum_{i=k-\tau}^{k-1} \delta \mathbb{E}\|\Delta^i\|_2^2 \geq \min\{\nu, 1\}(\mathbb{E}\|x^k - \bar{x}^k\|_2^2 + S(k, \tau)).$$

Using this, the monotonicity of  $\pi^k$ , and Lemma 2 yields

$$\pi_k \pi_{k+1} \leq (\pi_k)^2 \leq \frac{\alpha}{\min\{\nu, 1\}}(\pi_k - \pi_{k+1}) \cdot \pi_k. \quad (70)$$

Rearranging this yields the result.

#### Proof of Lemma 3

The Lipschitz continuity of  $\nabla f$  yields

$$\begin{aligned} f(x^{k+1}) - f(x^k) &\leq \langle \nabla f(x^k), \Delta^k \rangle + \frac{L}{2} \|\Delta^k\|_2^2 \\ &\stackrel{a)}{=} \langle \nabla f(x^k) - \nabla f(\hat{x}^k), \Delta^k \rangle + (\frac{L}{2} - \frac{L}{\gamma}) \|\Delta^k\|_2^2 \\ &\leq L \|d^k\|_2 \cdot \|\Delta^k\|_2 + (\frac{L}{2} - \frac{L}{\gamma}) \|\Delta^k\|_2^2, \end{aligned} \quad (71)$$

where a) is from  $-\frac{L}{\gamma} \|\Delta^k\|_2^2 = \langle \nabla f(\hat{x}^k), \Delta^k \rangle$ . We bound the expectation of  $\|d^k\|_2^2$  over the delay and using (33), we have:

$$\begin{aligned} \mathbb{E}_{\vec{j}(k)}(\|d^k\|_2^2 \mid \chi^k) &\leq \mathbb{E}_{\vec{j}(k)}\left(\sum_{l=1}^{j(k)} j(k) \|\Delta^{k-l}\|_2^2 \mid \chi^k\right) \\ &\leq \sum_{j=1}^{+\infty} j p_j \sum_{l=1}^j \|\Delta^{k-l}\|_2^2 \stackrel{b)}{=} \sum_{l=1}^{+\infty} \left(\sum_{j=l}^{+\infty} j p_j\right) \|\Delta^{k-l}\|_2^2 \stackrel{c)}{\leq} \sum_{i=0}^{k-1} c_{k-i} \|\Delta^i\|_2^2, \end{aligned} \quad (72)$$

where in b), we switched the order of summation in the double sum, and c) uses  $\sum_{j=l}^{+\infty} j p_j \leq c_l$ . Taking total expectation  $\mathbb{E}(\cdot)$  on both sides of (72), we obtain

$$\mathbb{E}\|d^k\|_2^2 \leq \sum_{i=0}^{k-1} c_{k-i} \mathbb{E}\|\Delta^i\|_2^2 \stackrel{d)}{\leq} \sum_{i=0}^{k-1} c_{k-1-i} \mathbb{E}\|\Delta^i\|_2^2 = R(k-1), \quad (73)$$

where d) is by the fact  $(c_i)_{i \geq 0}$  is descending. Hence:

$$\begin{aligned} \mathbb{E}[f(x^{k+1}) - f(x^k)] &\leq L \mathbb{E}\|d^k\|_2 \cdot \|\Delta^k\|_2 + (\frac{L}{2} - \frac{L}{\gamma}) \mathbb{E}\|\Delta^k\|_2^2 \\ &\leq \frac{L}{2\varepsilon} \mathbb{E}\|d^k\|_2^2 + \left[\frac{(\varepsilon+1)L}{2} - \frac{L}{\gamma}\right] \mathbb{E}\|\Delta^k\|_2^2 \\ &\leq \frac{L}{2\varepsilon} \sum_{l=1}^{+\infty} \left(\sum_{j=l}^{+\infty} j p_j\right) \mathbb{E}\|\Delta^{k-l}\|_2^2 + \left[\frac{(\varepsilon+1)L}{2} - \frac{L}{\gamma}\right] \mathbb{E}\|\Delta^k\|_2^2. \end{aligned} \quad (74)$$

Since  $\gamma < \frac{2}{2\sqrt{c_0}+1}$ , we can choose  $\varepsilon > 0$  such that

$$\frac{1}{2}(\varepsilon + \frac{c_0}{\varepsilon}) = \frac{1}{\gamma} - \frac{1}{2}. \quad (75)$$

With such  $\varepsilon$  and (74), direct calculation using the definition of  $G^k$  yields (22). When  $\gamma < \frac{2}{2\sqrt{c_0}+1}$ ,  $\frac{L}{2}(\frac{1}{\gamma} - \frac{1}{2} - \sqrt{c_0}) > 0$ . From (22), we can see  $(R(k))_{k \geq 0}$  is summable (telescoping sum). Thus, we have  $\lim_k R(k) = 0$ . Then note (73) and

$$c_0 \mathbb{E} \|\Delta^k\|_2^2 \leq \sum_{i=0}^k c_{k-i} \mathbb{E}(\|\Delta^i\|_2^2) = R(k). \quad (76)$$

Hence then have

$$\lim_k \mathbb{E}(\|d^k\|_2^2) = 0, \quad \lim_k \mathbb{E}(\|\Delta^k\|_2^2) = 0. \quad (77)$$

### Proof of Theorem 5

Let  $t = t(k) = \lfloor k/N' \rfloor$ . Recalling  $K(i, t)$  is defined at Sec. 1.1, we have:

$$\begin{aligned} \|\nabla_i f(x^k)\|_2 &\stackrel{a)}{\leq} \|\nabla_i f(\hat{x}^{K(i,t)})\|_2 + \|\nabla_i f(x^{K(i,t)}) - \nabla_i f(\hat{x}^{K(i,t)})\|_2 + \|\nabla_i f(x^k) - \nabla_i f(x^{K(i,t)})\|_2 \\ &\stackrel{b)}{\leq} \|\nabla_i f(\hat{x}^{K(i,t)})\|_2 + L \|d^{K(i,t)}\|_2 + L \sum_{j=K(i,t)}^{k-1} \|\Delta^j\|_2, \end{aligned} \quad (78)$$

where a) is by the triangle inequality and b) by the Lipschitzness of  $\nabla f$  and then applying the triangle inequality to the expansion of  $\|x^k - x^{K(i,t)}\|$ . We now bound each of the right-hand terms.

Since, as  $k \rightarrow \infty$ ,  $K(i, t) \rightarrow \infty$ . With the Cauchy-Schwarz inequality and (23), we have

$$\lim_k \mathbb{E} \|d^{K(i,t)}\|_2 \leq \lim_k (\mathbb{E} \|d^{K(i,t)}\|_2^2)^{\frac{1}{2}} = 0. \quad (79)$$

By  $\lim_j \mathbb{E} \|\Delta^j\|_2 \leq \lim_j (\mathbb{E} \|\Delta^j\|_2^2)^{\frac{1}{2}} = 0$ ,

$$\lim_k L \sum_{j=K(i,t)}^{k-1} \mathbb{E} \|\Delta^j\|_2 = 0. \quad (80)$$

Now notice:

$$\|\nabla_i f(\hat{x}^{K(i,t)})\|_2 = \|\nabla_{i_{K(i,t)}} f(\hat{x}^{K(i,t)})\|_2 = \frac{L}{\gamma} \|d^{K(i,t)}\|_2. \quad (81)$$

Since  $\mathbb{E} \|d^{K(i,t)}\|_2 \rightarrow 0$  as  $K(i, t) \rightarrow \infty$ , we have

$$\lim_k \mathbb{E} \|\nabla_i f(\hat{x}^{K(i,t)})\|_2 = 0. \quad (82)$$

Taking expectations on both sides of (78), and using (79), (80) and (82), we then prove the result.

### Proof of Theorem 6

Recall  $j(k)$  defined near (3). Similar to the bound of  $\|d^k\|_2^2$  in (34), we have

$$\mathbb{E}_{\vec{j}(k)} (\|x^k - x^{k-j(k)}\|_2^2 \mid \chi^k) \leq \sum_{i=0}^{k-1} s_{k-1-i} \|\Delta^i\|_2^2. \quad (83)$$

Taking total expectations of both sides yields

$$\mathbb{E} \|x^k - x^{k-j(k)}\|_2^2 \leq \sum_{i=0}^{k-1} s_{k-1-i} \mathbb{E} \|\Delta^i\|_2^2. \quad (84)$$

We have

$$\begin{aligned}
\mathbb{E}\|\nabla_{i_k} f(x^{k-j(k)})\|_2^2 &\stackrel{a)}{\leq} \mathbb{E}(\|\nabla_{i_k} f(x^k)\|_2 + \|\nabla_{i_k} f(x^{k-j(k)}) - \nabla_{i_k} f(x^k)\|_2)^2 \\
&\stackrel{b)}{\leq} 2\mathbb{E}\|\nabla_{i_k} f(x^k)\|_2^2 + 2L^2\mathbb{E}\|x^k - x^{k-j(k)}\|_2^2 \\
&\stackrel{c)}{\leq} 4\mathbb{E}\|\nabla_{i_k} f(\hat{x}^k)\|_2^2 + 4L^2\mathbb{E}\|d^k\|_2^2 + 2L^2\mathbb{E}\|x^k - x^{k-j(k)}\|_2^2 \\
&\stackrel{d)}{\leq} \frac{4L^2}{\gamma^2}\mathbb{E}\|\Delta^k\|_2^2 + 6L^2\sum_{i=0}^{k-1} s_{k-1-i}\mathbb{E}\|\Delta^i\|_2^2,
\end{aligned} \tag{85}$$

where a) follows from the triangle inequality, b) from the Lipschitzness of  $\nabla f$  and (33), and c) from  $\|\nabla_{i_k} f(x^k)\|_2^2 \leq 2\|\nabla_{i_k} f(\hat{x})\|_2^2 + 2L^2\|d^k\|_2^2$  and (34), and d) from (84). Taking total expectation of both sides of assumption (25) yields

$$\mathbb{E}\|\nabla_{i_k} f(x^{k-j(k)})\|_2^2 = \frac{\mathbb{E}\|\nabla f(x^{k-j(k)})\|_2^2}{N}. \tag{86}$$

By the triangle inequality,

$$\|\nabla f(x^k)\|_2^2 \leq 2\|\nabla f(x^{k-j(k)})\|_2^2 + 2L^2\sum_{i=0}^{k-1} s_{k-1-i}\mathbb{E}\|\Delta^i\|_2^2. \tag{87}$$

Hence, combining (86) and (87) produces

$$\mathbb{E}\|\nabla f(x^{k-j(k)})\|_2^2 \leq \frac{4NL^2}{\gamma^2}\mathbb{E}\|\Delta^k\|_2^2 + 6NL^2\sum_{i=0}^{k-1} s_{k-1-i}\mathbb{E}\|\Delta^i\|_2^2;$$

which is substituted into (87) to yield

$$\mathbb{E}\|\nabla f(x^k)\|_2^2 \leq \frac{8NL^2}{\gamma^2}\mathbb{E}\|\Delta^k\|_2^2 + (12N + 2)L^2\sum_{i=0}^{k-1} s_{k-1-i}\mathbb{E}\|\Delta^i\|_2^2. \tag{88}$$

By  $\sum_{i=0}^{k-1} s_{k-1-i} \leq \sum_{i=0}^{k-1} c_{k-1-i}\mathbb{E}\|\Delta^i\|_2^2 = R(k-1)$  and (22),

$$\lim_k \mathbb{E}\|\nabla f(x^k)\|_2^2 = 0. \tag{89}$$

The proof is completed by applying the Cauchy-Schwarz inequality

$$\mathbb{E}\|\nabla f(x^k)\|_2 \leq (\mathbb{E}\|\nabla f(x^k)\|_2^2)^{\frac{1}{2}}. \tag{90}$$

#### Proof of Lemma 4

This proof is very similar to Lemma 2 except that  $R(k)$  plays the role of  $S(k, \tau)$ . Let

$$a^k = \begin{pmatrix} \frac{x^k - x^k}{\sqrt{c_0\bar{\delta}\Delta^{k-1}}} \\ \vdots \\ \sqrt{c_k\bar{\delta}\Delta^0} \end{pmatrix}, b^k = \begin{pmatrix} \frac{\nabla f(x^k)}{\sqrt{c_0\bar{\delta}\Delta^{k-1}}} \\ \vdots \\ \sqrt{c_k\bar{\delta}\Delta^0} \end{pmatrix}. \tag{91}$$

Thus, we have

$$G_k - \min f \leq \langle a^k, b^k \rangle \leq \|a^k\|_2 \|b^k\|_2. \tag{92}$$

By taking expectations, we get

$$\mathbb{E}(G_k - \min f) \leq \mathbb{E}(\|a^k\|_2 \|b^k\|_2) \leq [\mathbb{E}\|a^k\|_2^2 \cdot \mathbb{E}\|b^k\|_2^2]^{1/2}. \tag{93}$$

By (88) and the definitions of  $a^k, b^k, R(k)$ , we get

$$\begin{aligned}
[\mathbb{E}(G_k - \min f)]^2 &\leq \mathbb{E}(\|a^k\|_2^2) \cdot \mathbb{E}(\|b^k\|_2^2) \\
&\leq (\bar{\delta}R(k) + \mathbb{E}\|\nabla f(x^k)\|_2^2) \times (\bar{\delta}R(k) + \mathbb{E}\|x^k - \bar{x}^k\|_2^2) \\
&\leq \bar{\beta}R(k) \times (R(k) + \mathbb{E}\|x^k - \bar{x}^k\|_2^2).
\end{aligned} \tag{94}$$

Finally, from the definition of  $\bar{\alpha}$  and Lemma 3, the theorem follows.

### Proof of Theorem 7

We have

$$\mathbb{E}(f(x^k) - \min f) \geq \nu \mathbb{E}\|x^k - \bar{x}^k\|_2^2, \quad (95)$$

which also means that

$$\mathbb{E}(\bar{\delta}R(k) + \|x^k - \bar{x}^k\|_2^2) \leq \max\{1, \frac{1}{\nu}\} \phi_k. \quad (96)$$

Lemma 4 yields

$$(\phi_k)^2 \leq \bar{\alpha} \max\{1, \frac{1}{\nu}\} (\phi_k - \phi_{k+1}) \cdot (\phi_k) \quad (97)$$

Note that  $\phi_k$  is decreasing, we obtain

$$\phi_{k+1} \leq \bar{\alpha} \max\{1, \frac{1}{\nu}\} (\phi_k - \phi_{k+1}). \quad (98)$$

Then, we have the result by rearrangement.

### Proof of Lemma 5

$$\begin{aligned} f(x^{k+1}) &\stackrel{a)}{\leq} f(x^k) + L\|d^k\|_2 \cdot \|\Delta^k\|_2 + (\frac{L}{2} - \frac{L}{\gamma_k})\|\Delta^k\|_2^2 \\ &\stackrel{b)}{\leq} f(x^k) + L \sum_{l=1}^{j(k)} \|\Delta^{k-l}\|_2 \cdot \|\Delta^k\|_2 + (\frac{L}{2} - \frac{L}{\gamma_k})\|\Delta^k\|_2^2 \\ &\stackrel{c)}{\leq} f(x^k) + L \sum_{l=1}^{j(k)} (\frac{\epsilon_l}{2} \|\Delta^{k-l}\|_2^2 + \frac{1}{2\epsilon_l} \|\Delta^k\|_2^2) + (\frac{L}{2} - \frac{L}{\gamma_k})\|\Delta^k\|_2^2 \\ &= f(x^k) + \frac{L}{2} \sum_{l=1}^{j(k)} \epsilon_l \|\Delta^{k-l}\|_2^2 + \frac{L}{2} \sum_{l=1}^{j(k)} \frac{1}{\epsilon_l} \|\Delta^k\|_2^2 + (\frac{L}{2} - \frac{L}{\gamma_k})\|\Delta^k\|_2^2 \\ &\stackrel{d)}{\leq} f(x^k) + \frac{L}{2} \sum_{l=1}^{+\infty} \epsilon_l \|\Delta^{k-l}\|_2^2 + \frac{L}{2} (1 + \sum_{l=1}^{j(k)} \frac{1}{\epsilon_l} - \frac{2}{\gamma_k})\|\Delta^k\|_2^2. \end{aligned} \quad (99)$$

where a) follows from Lipschitzness of  $\nabla f$  and definitions of  $d^k, \Delta^k$ , b) from the triangle inequality, c) from (32), and d) from  $j(k) < \infty$ . Then, a direct calculation yields the first result in (29). Hence the second follows by summability:  $\|\Delta^k\|_2^2 \in \ell^1$ .

$$\lim_{k \in Q_T} \|d^k\|_2 \leq \sum_{l=k-T}^{k-1} \lim_l \|\Delta^l\|_2 = 0 \quad (100)$$

$$L(\frac{1}{\gamma_k} - D_{j(k)})\|\Delta^k\|_2^2 = \frac{c(1-c)}{LD_{j(k)}} \|\nabla_{i_k} f(\hat{x}^k)\|_2^2. \quad (101)$$

Therefore,

$$\frac{1}{D_T} \sum_{k \in Q_T} \|\nabla_{i_k} f(\hat{x}^k)\|_2^2 < \sum_k \frac{\|\nabla_{i_k} f(\hat{x}^k)\|_2^2}{D_{j(k)}} < +\infty. \quad (102)$$

### Proof of Theorem 8

For any  $T$  and  $k \in Q_T$ , let  $t = t(k) = \lfloor k/N' \rfloor$ , and by the triangle inequality:

$$\begin{aligned} \|\nabla_i f(x^k)\| &\leq \|\nabla_i f(x^{K(i,t)}) - \nabla_i f(x^k)\|_2 \\ &\quad + \|\nabla_i f(\hat{x}^{K(i,t)}) - \nabla_i f(x^{K(i,t)})\|_2 + \|\nabla_i f(\hat{x}^{K(i,t)})\|_2. \end{aligned} \quad (103)$$



From Lemma 5, we have

$$\lim_k \|\nabla_i f(x^{K(i,t)}) - \nabla_i f(x^k)\|_2 \leq \lim_k L \sum_{i=k-N'+1}^{k-1} \|\Delta^i\|_2 = 0. \quad (104)$$

Noting  $K(i, t) \in Q_T$  by the ECSD assumption, we can derive

$$\lim_k \|\nabla_i f(\hat{x}^{K(i,t)}) - \nabla_i f(x^{K(i,t)})\|_2 \leq \lim_k L \|d^{K(i,t)}\|_2 = 0. \quad (105)$$

Now notice by Lemma 5:

$$\lim_k \|\nabla_i f(\hat{x}^{K(i,t)})\|_2 = \lim_{K(i,t)} \|\nabla_{i_{K(i,t)}} f(\hat{x}^{K(i,t)})\|_2 = 0.$$

Since  $K(i, t) \rightarrow \infty$ , this right term converges to 0 and the result is proven.
